# Supplementary material
Source: ML conference proceedings conference paper supplement (https://www.ecva.net/papers/eccv_2020/papers_ECCV/html/123580290_ECCV_2020_paper.php)
Supplement: Supplementary file 3 [file 123580290-supp.zip]

Archive with 9 entries (6 files):
- 1851_supp/
- 1851_supp/.DS_Store
- __MACOSX/
- __MACOSX/1851_supp/
- __MACOSX/1851_supp/._.DS_Store
- 1851_supp/supplementary.pdf
- __MACOSX/1851_supp/._supplementary.pdf
- 1851_supp/scribble-box.mp4
- __MACOSX/1851_supp/._scribble-box.mp4
